# Supplementary material for: Graphene based flexible electrochromic devices
Source: PubMed Central journal article supplement — Sci Rep. 2014 Oct 1;4:6484. doi: 10.1038/srep06484 (PMC4180825; doi:10.1038/srep06484), 2014-10-01
Supplement: srep06484-s4.pdf [file srep06484-s4.pdf]

**Supplementary information for**  
**Graphene based flexible electrochromic devices**

Emre O. Polat, Osman Balci, Coskun Kocabas<sup>†</sup>

Bilkent University, Department of Physics, 06800, Ankara, Turkey

<sup>†</sup> Corresponding author

email: [ckocabas@fen.bilkent.edu.tr](mailto:ckocabas@fen.bilkent.edu.tr), Phone: +90 3122908078

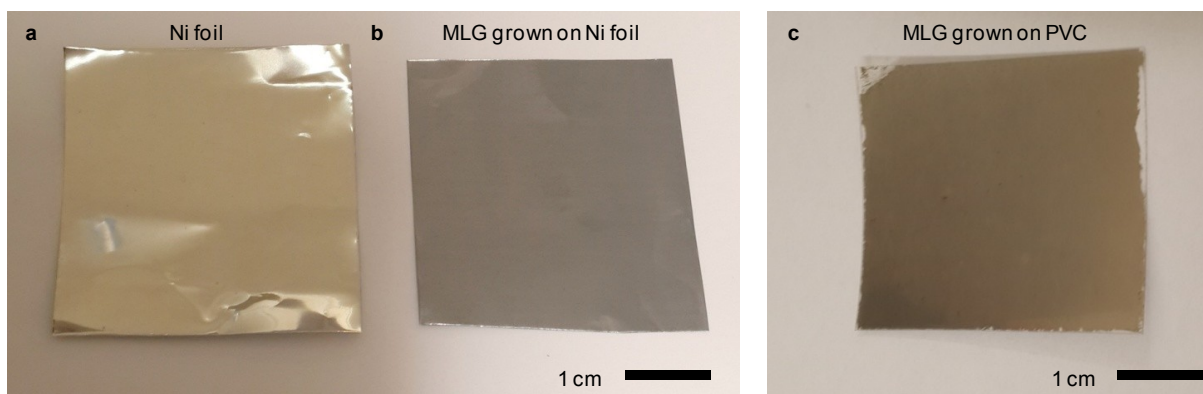

Figure S1: **a,b**, Photographs of the bare nickel foil and graphene grown on nickel foil respectively. **c**, Photograph of graphene on PVC substrate.

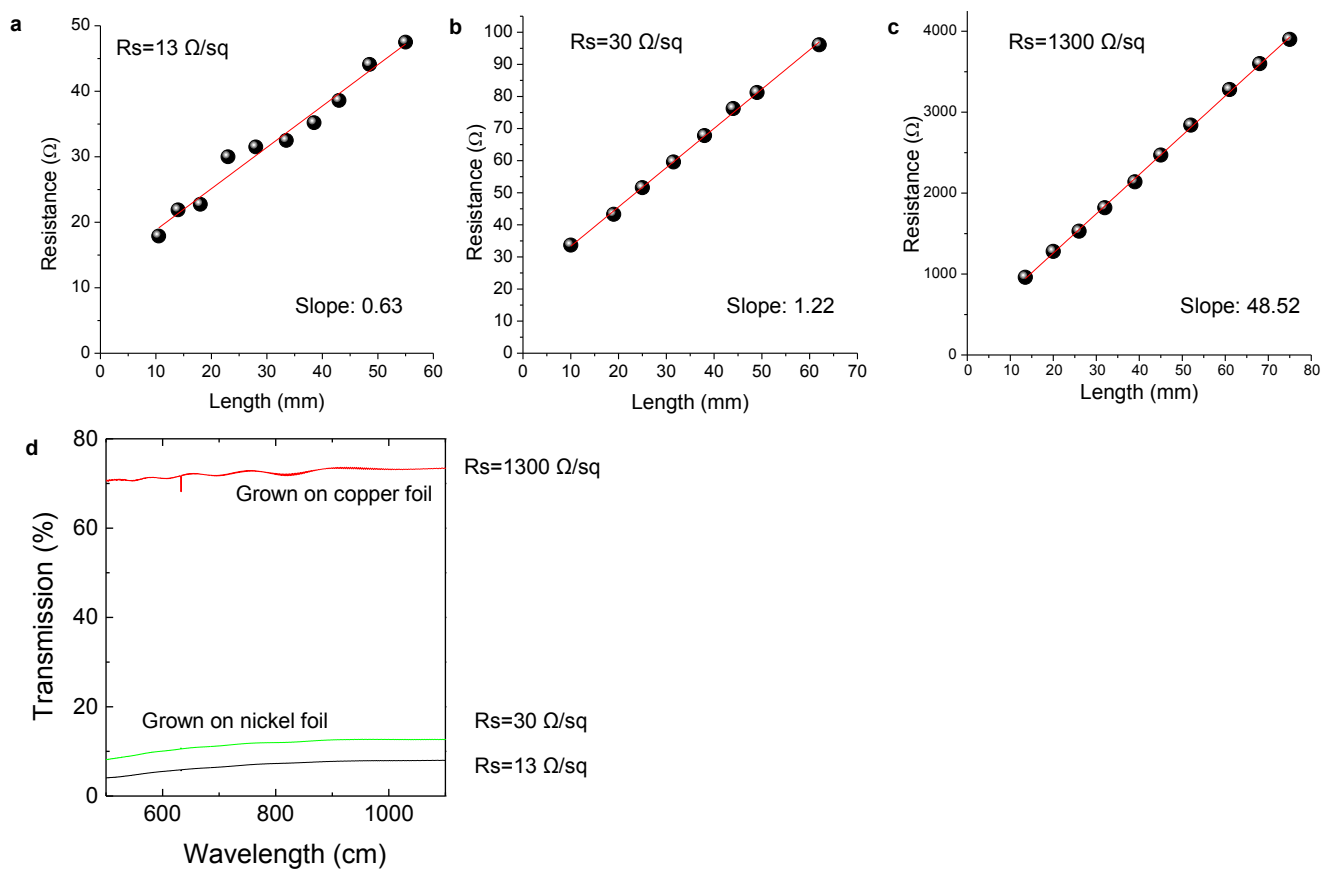

Figure S2: **a-c**, Transfer line measurements for three different MLG. The slope yields the sheet resistance of the electrodes. The sheet resistance varies between  $13 \Omega/\text{sq}$  to  $1300 \Omega/\text{sq}$ . **d**, Optical transmission spectra of the MLG electrodes used for transfer line measurements.

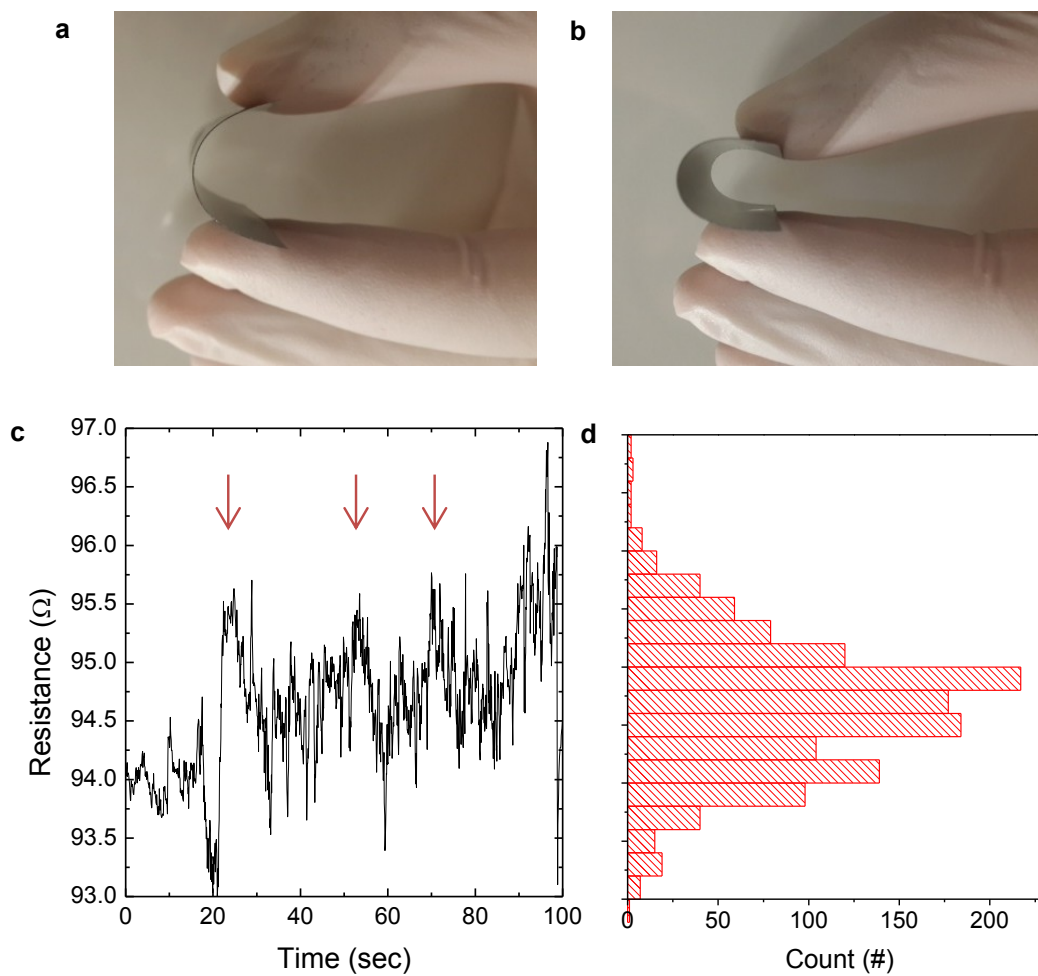

Figure S3: Bending test for the graphene electrodes. **a,b** photographs of the MLG electrodes on flexible PVC substrates. **c**, Variation of resistance of MLG electrode as the electrode is deformed. **d**, the histogram of the resistance.

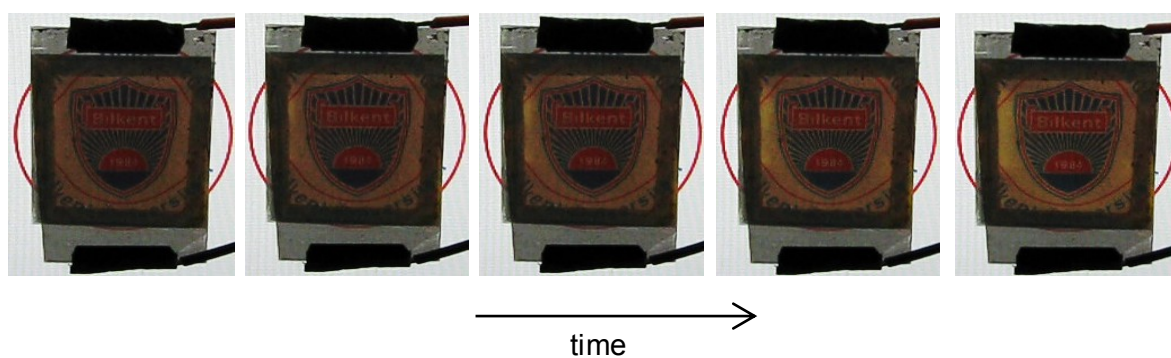

Figure S4: The variation of the optical transmittance of the device at +4 V. The intercalation process starts from the edge of the sample and propagates along the device.

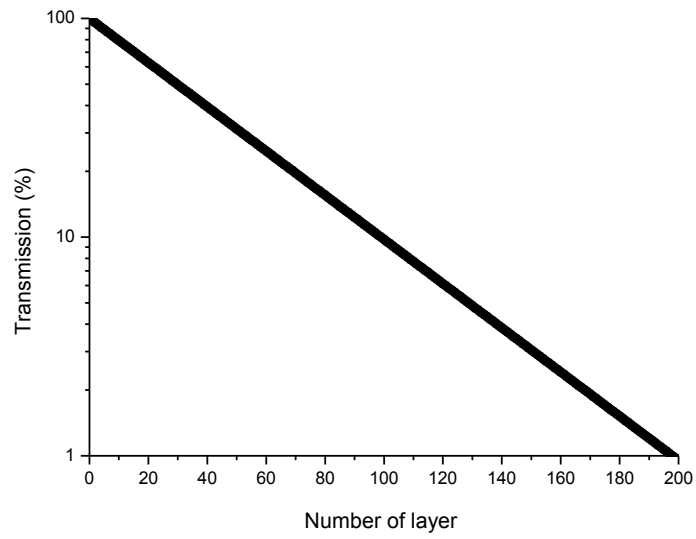

Figure S5: Calculated optical transmission of MLG plotted against the number of layers.  $T = (1 - \alpha)^N$ , where  $T$  is the transmission,  $\alpha$  is the absorption of single layer which is around 2.3 % and  $N$  is the number of graphene layers.

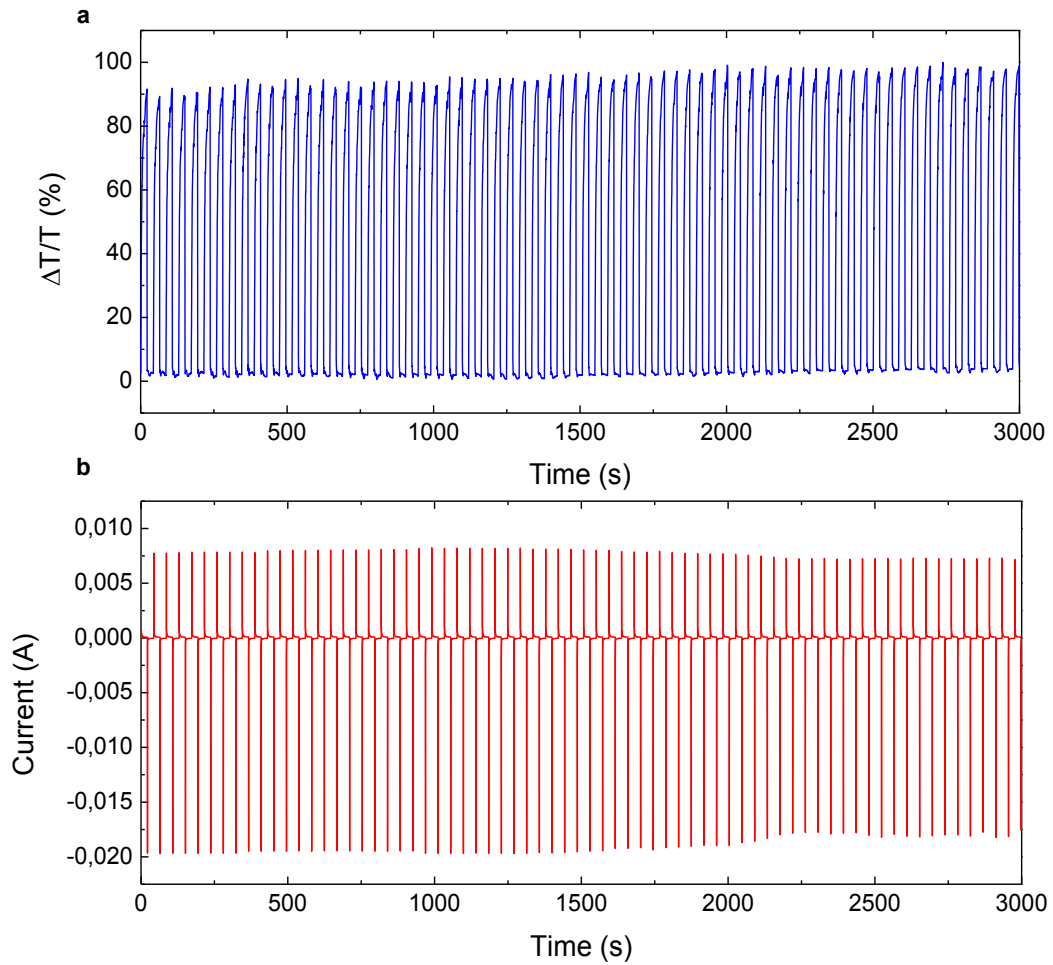

Figure S6: **a,b**, Time trace of the percentage transmittance and charging current.
